# Supplementary material for: Organoid Profiling Identifies Common Responders to Chemotherapy in Pancreatic Cancer
Source: Oxford University Press journal article supplement (doi:10.1158/2159-8290.cd-18-0349), 2018-05-31
Supplement: 21598290cd180349-sup-199398_2_supp_4775181_p95dlk.xlsx [file 21598290cd180349-sup-199398_2_supp_4775181_p95dlk.xlsx]

## Sheet: Key
Table S5.
Genes correlated with AUC for each chemotherapeutic agent.
Genes with a negative Rho value were used for Figures 6, 7, S10, S11, S12.
S5A. GEM profile.
S5B. PAC profile.
S5C. SN38 profile.
S5D. 5FU profile.
S5E. OXA profile.

## Sheet: GEM profile
Table S5A.
Genes correlated to gemcitabine sensitivity in PDOs
symbol	rho
CREB3L4	0.451868
TMC4	0.43735
SENP7	0.429598
BICDL2	0.415645
MARF1	0.417054
CALCOCO1	0.394644
OS9	0.426357
TPD52	0.51938
DNAH1	0.542636
TMEM254	0.392389
NRBP2	0.389852
CSAD	0.517407
MEF2D	0.458351
ESRP1	0.45976
SLC35E1	0.481184
KDM5B	0.439464
HBP1	0.393658
SMPD3	0.431572
SIM2	0.498802
SLC50A1	0.439464
TCEA3	0.519803
CEBPD	0.408739
KLHL24	0.439042
PCED1A	0.43735
INTS3	0.52389
LIPH	0.432699
SLC27A1	0.45525
TSPAN31	0.456942
RNF19A	0.406906
AP3S1	0.539535
SDC4	0.511487
KLHL3	0.459197
BRWD1	0.425088
GOLPH3L	0.460606
FXYD3	0.460606
BCL6	0.387597
YPEL5	0.402255
S100A13	0.406202
ELL	0.410712
TSTD1	0.428189
LETMD1	0.473996
DUSP4	0.393517
ALDH1L2	0.387738
MIA3	0.387738
PCMTD2	0.404792
R3HDM4	0.408879
TMEM163	0.386751
RALGPS1	0.38661
SLU7	0.4537
CAB39L	0.429739
SDHC	0.477519
ATF6	0.46864
TMEM59	0.40296
NCSTN	0.409866
PBXIP1	0.403946
PNMA2	0.444116
ERLEC1	0.442565
STXBP2	0.386469
ACAD10	0.406483
ELMO3	0.39098
KRTCAP2	0.42241
TFF3	0.4
ADGRE5	0.438196
MMP28	0.460747
SIDT2	0.459197
ZFP64	0.468358
RAB25	0.439323
COPA	0.389288
SMIM19	0.396899
KDM3A	0.403805
LYST	0.407752
PEX11B	0.454405
RSPH1	0.420719
SPIRE2	0.455814
FP565260.3	0.450035
PAN2	0.418323
RRNAD1	0.410007
MAGI1	0.427907
FBXO46	0.399436
DCAF8	0.468781
SPPL2B	0.398168
NBPF12	0.386892
C20orf194	0.387879
PPM1L	0.467089
ERN2	0.426075
HSF4	0.415927
SEZ6L2	0.41043
ITM2B	0.390839
N4BP2L2	0.393939
MC1R	0.407329
THBS3	0.609302
ZFC3H1	0.405497
ZDHHC11	0.418182
GTF2IRD2B	0.444538
LMF1	0.418746
ASNSD1	-0.518957
CISD3	-0.42382
TBCD	-0.467653
CASKIN2	-0.468499
ARHGDIA	-0.51642
PNPO	-0.426779
DUSP14	-0.419168
CENPM	-0.408175
TACO1	-0.415645
GUF1	-0.421001
GOT2	-0.43735
CUTC	-0.40747
MSH6	-0.387174
KHK	-0.390557
STARD3	-0.392953
FAM102B	-0.394926
POLR2D	-0.399859
LRRC45	-0.396476
MMD	-0.402537
COA3	-0.404651
RNF43	-0.463002
KIF18B	-0.451868
RHOBTB3	-0.426357
BIN1	-0.433122
GIT1	-0.389711
MRTO4	-0.39098
HIRA	-0.483862
ACACA	-0.399718
PISD	-0.45666
RANBP1	-0.542354
SRRT	-0.509796
TMEM177	-0.509091
CNP	-0.452008
CNOT9	-0.463002
DPY19L1	-0.503594
CTU2	-0.490627
AP2B1	-0.466385
PRMT6	-0.439605
TRMU	-0.395913
NCAPH2	-0.451445
UBE2L3	-0.464271
ANKRD40	-0.465257
SLC25A39	-0.419732
CCAR1	-0.423961
MICAL3	-0.400564
MRPL27	-0.39408
SELENOI	-0.428753
KPNB1	-0.410289
DNAJC2	-0.454123
DUS1L	-0.393517
NT5C3B	-0.429175
SLFN11	-0.446089
RCC1	-0.456237
METAP1	-0.419168
MIIP	-0.395208
SPECC1L	-0.395349
CUL1	-0.403805
MAIP1	-0.393235
ABCE1	-0.401691
ILKAP	-0.610853
FGFR1OP	-0.443411
IMP4	-0.424806
NF2	-0.498238
HNRNPD	-0.460606
COPRS	-0.461593
PAQR3	-0.396617
TRRAP	-0.408457
SNRNP40	-0.46723
HSPE1	-0.387456
POM121C	-0.417054
ZNF398	-0.388724
HCFC1	-0.394785
GPAM	-0.414799
ATAD5	-0.422833
CENPX	-0.427907
PAICS	-0.415504
WASF1	-0.424806
HTT	-0.389711
BIRC5	-0.434249
RFC1	-0.401409
MCM6	-0.432417
PPIG	-0.397886
RIF1	-0.400564
PDS5A	-0.455955
RBM28	-0.47019
UBA6	-0.425652
CPSF4	-0.407047
PAXIP1	-0.41494
RNF166	-0.453136
MTFP1	-0.432276
TOMM22	-0.475687
PRIMPOL	-0.426638
ESS2	-0.485976
SLBP	-0.450881
ZC3H15	-0.421424
LSM6	-0.440592
ZDHHC16	-0.43284
NAA15	-0.422269
CCDC117	-0.387597
RPS6KA6	-0.395132
WDR33	-0.406342
TSN	-0.474137
MRPL12	-0.431712
DTYMK	-0.397322
SLC25A10	-0.387315
SMTN	-0.40902
RFC2	-0.471741
TAF6	-0.400987
RAD51C	-0.388724
GINS2	-0.408034
PSMC3IP	-0.462579
AADAT	-0.434109
CEP131	-0.396758
CEP135	-0.473009
METTL21A	-0.446371
SSB	-0.410571
UBXN2A	-0.422833
ABCB6	-0.392248
GNA12	-0.400141
FLCN	-0.40747
LETM1	-0.417618
RANGAP1	-0.412262
RCC1L	-0.544468
ENOPH1	-0.518816
PDAP1	-0.44186
SMPD4	-0.448344
ZNF511	-0.468217
NSD2	-0.453277
MRFAP1	-0.390557
FAM133B	-0.479634

## Sheet: PAC profile
Table S5B.
Genes correlated to paclitaxel sensitivity in PDOs
symbol	rho
NDUFB1	0.55814
KLHL3	0.542495
DUSP4	0.527555
S100A6	0.51938
PNMA1	0.51346
RABAC1	0.50303
TSTD1	0.50148
SDC4	0.501198
TSPAN31	0.498943
WRN	0.495278
AP3S1	0.490909
KIF13B	0.485412
CHCHD7	0.481043
PET100	0.478506
RNF19A	0.47766
SSBP2	0.47611
UQCR11	0.474419
EPHA7	0.471807
OXR1	0.471459
TMEM9B	0.466808
IFNAR2	0.463989
RAB2A	0.463566
RABGAP1L	0.461593
ETHE1	0.456519
KDELR3	0.454968
S100A13	0.454264
GOLGA7	0.452149
PDK4	0.450176
ARHGEF18	0.448344
ATP5E	0.448344
UBL5	0.446371
GADD45B	0.445243
IFNGR2	0.440733
LETMD1	0.440028
RASA1	0.439746
TMEM135	0.439183
DCTN6	0.439042
PLAG1	0.438478
INSR	0.437914
BNIP3L	0.436082
TRIB2	0.436082
PRDM8	0.434954
GMIP	0.430021
GPAT4	0.428753
ZNFX1	0.428612
PEX19	0.426075
RAB11B	0.425229
BACE1	0.425229
MAU2	0.424665
GPR108	0.424665
HELZ2	0.42382
S100A11	0.423397
TMEM205	0.421001
TMEM127	0.420014
TXNIP	0.419873
GATA3	0.418464
GGH	0.414799
JRKL	0.414799
SKAP2	0.413672
ORMDL2	0.413672
LEPROTL1	0.413531
PIGC	0.413108
SLPI	0.412403
P2RY1	0.410148
ZFYVE1	0.409584
JCAD	0.408739
TRIM52	0.408034
SMIM7	0.406483
CCDC71L	0.405497
SH2D3A	0.403946
SLC27A1	0.403946
GPR137B	0.401973
PCMTD2	0.401268
SATB1	0.399718
WBP1	0.398168
ANKRD36C	0.397745
NHLRC3	0.397463
LDLR	0.39704
DPM3	0.394644
TFPI	0.393939
ATXN3	0.392671
FAM172A	0.392248
ELL	0.39098
H2AFJ	0.390416
YIPF2	0.389429
R3HDM4	0.388865
ZNF365	0.388584
C21orf33	0.387456
DERL1	0.387174
IER2	0.386892
TMEM11	-0.386751
PRKAR1B	-0.387174
DHRSX	-0.387315
IMPA2	-0.38802
ZNF511	-0.38802
XPO6	-0.388865
LDLRAP1	-0.389429
ARHGEF19	-0.38957
SMS	-0.389993
RCC1	-0.390275
UBTF	-0.390839
UTP11	-0.391261
DNAJC11	-0.391825
PDHX	-0.392953
PABPN1	-0.393376
EMC1	-0.393798
KCTD20	-0.39408
ZBTB2	-0.39408
PDAP1	-0.394221
MAST2	-0.395913
ZKSCAN2	-0.396195
EIF4H	-0.396476
PPP2R5D	-0.396758
FAM83G	-0.39704
LIMK2	-0.397463
CLCN2	-0.397463
UNC45A	-0.397886
HDHD5	-0.398027
ZNF106	-0.399013
GTF2H1	-0.399436
ANKRD40	-0.400705
SLC4A2	-0.400846
REPIN1	-0.401128
CDCA7	-0.402396
USP36	-0.40296
UBE2J2	-0.40296
NSD2	-0.403524
DNAAF5	-0.403665
UIMC1	-0.403805
ZBTB17	-0.404087
FTL	-0.405497
SKI	-0.406061
RCC2	-0.407752
CDV3	-0.409443
HES6	-0.410289
HGD	-0.410867
MAP3K21	-0.411276
OGFRL1	-0.415081
AGFG1	-0.415081
PCBD1	-0.416631
BCAR1	-0.417618
C1orf109	-0.417759
MIB2	-0.4179
TRIM16L	-0.418182
SNN	-0.418464
SRF	-0.421001
CTBP1	-0.421564
HSPD1	-0.421987
NOL9	-0.422551
NOP14	-0.422974
RCC1L	-0.423397
MAFG	-0.423679
FGFR4	-0.424242
COA7	-0.424947
RNF8	-0.426216
RSL1D1	-0.426779
YWHAG	-0.42692
SMPD4	-0.42692
SZRD1	-0.427625
NT5DC3	-0.428894
LRRC47	-0.428894
METAP1	-0.429316
NRSN2	-0.429598
RNF144A	-0.430867
SELENON	-0.43129
IDH2	-0.433122
RPAP1	-0.434249
SP5	-0.436786
NOTCH1	-0.439183
SRRM1	-0.439323
TRAM2	-0.44186
PPIF	-0.442847
STEAP3	-0.444961
MRTO4	-0.446653
BIN1	-0.447075
MIIP	-0.447498
BAK1	-0.447639
TKT	-0.447921
CSK	-0.450176
CLCN6	-0.45525
ENOPH1	-0.458774
UBR4	-0.462297
PLEKHM2	-0.46272
HDDC2	-0.462861
NELFA	-0.463707
PGD	-0.464271
SLC25A33	-0.472727
AKAP17A	-0.47907
ZBTB40	-0.480761
THAP4	-0.482593
ARVCF	-0.485976
MAZ	-0.501621
ATXN2L	-0.502889
GIT1	-0.505144
UNKL	-0.50599
HIRA	-0.509655
RAB32	-0.512051
BEND3	-0.515011
GTPBP6	-0.531078
CNKSR3	-0.537844
ABCB6	-0.547428

## Sheet: SN38 profile
Table S5C.
Genes correlated to SN38 sensitivity in PDOs
symbol	rho
TPCN1	0.509373
TFG	0.507118
UACA	0.505567
PAN3	0.49105
MC1R	0.488231
SELENBP1	0.48809
THBS3	0.475405
VPS9D1	0.47019
MX2	0.469767
B3GNT3	0.469486
TMEM127	0.46723
TMED10	0.464975
NUMB	0.460888
NCK1	0.45821
LGALS3	0.457928
TPD52	0.454686
MTIF3	0.452149
ZBTB46	0.449471
ZBTB1	0.449331
TMEM9B	0.448626
YY1	0.447216
ETV6	0.444538
DDR1	0.439746
TRAPPC13	0.43735
ZNF148	0.4358
SLC24A1	0.434813
NHLRC3	0.43439
SYT17	0.432699
DNAH1	0.431149
TRIM38	0.430585
DBNDD2	0.430585
SRSF5	0.428612
YPEL5	0.428189
FRY	0.427625
ANKRD13A	0.423961
IRF2BPL	0.42382
MOAP1	0.423115
SPICE1	0.422833
PACS2	0.422551
BICDL1	0.418323
TBC1D23	0.414658
FAM103A1	0.414517
SIM2	0.413108
MARF1	0.412685
SOX13	0.409443
WDR5B	0.407047
PCDHAC2	0.4064
PDE4A	0.405356
CBLB	0.404369
IFNAR2	0.404228
DNAH2	0.404228
CEBPD	0.404228
PLEKHF2	0.403665
PARM1	0.403383
MFGE8	0.402396
ATXN3	0.401409
TSPAN31	0.401268
TMC4	0.400987
EBAG9	0.4
KLHDC2	0.399013
NEPRO	0.397745
CREB3L4	0.39704
GOLGA5	0.396195
CALCOCO1	0.395631
FUT3	0.395067
PIAS1	0.393798
OXR1	0.39253
AP3S1	0.390557
CAB39L	0.389993
NUDT22	0.389711
ATP5S	0.389711
SLC27A1	0.389711
CLSTN3	0.388161
TAPBPL	0.387738
RRNAD1	0.387456
MUC20	0.38661
PSCA	0.386469
NCOR1	-0.386469
PDAP1	-0.387315
DNAJC2	-0.387597
HMGN3	-0.387738
FAM219A	-0.388865
POP7	-0.388865
ABCF2	-0.389288
CYP2U1	-0.389288
CENPX	-0.38957
ASCC3	-0.390134
LRRC41	-0.39098
PFAS	-0.39098
HNRNPD	-0.391684
NBPF1	-0.392953
C17orf51	-0.39346
EDC4	-0.393517
ARHGDIA	-0.394644
STMN1	-0.394785
POMZP3	-0.395631
SERBP1	-0.396335
PAICS	-0.396335
HSPD1	-0.397322
LSM10	-0.398309
PIKFYVE	-0.399013
PPP2R1B	-0.399577
SPAG5	-0.400141
PGM2	-0.400141
RPF2	-0.400282
MYBBP1A	-0.400423
FASN	-0.400423
MED24	-0.401409
SRM	-0.401409
NUP160	-0.401691
RPA2	-0.401832
TPST2	-0.40296
DUS1L	-0.40296
ZBTB40	-0.403101
FGFR1OP	-0.403665
IMP4	-0.403805
CEP250	-0.403946
TBCD	-0.406202
TYW3	-0.406906
HTT	-0.407752
PDXP	-0.407893
CEP78	-0.407893
BIRC5	-0.409161
AADAT	-0.411416
PSMD11	-0.411416
EPB41	-0.411416
EIF2B3	-0.414094
EIF3I	-0.414376
CCT7	-0.41494
HMGB2	-0.41494
FBXO42	-0.416209
POLR1A	-0.416913
POLR3H	-0.41945
NF2	-0.419873
DHX34	-0.420155
RPL9	-0.421424
HMGN2	-0.421564
CENPE	-0.421705
HCFC1	-0.421705
HIRA	-0.424383
CUL1	-0.424947
DPY19L1	-0.42692
KLC2	-0.427343
ELOVL6	-0.428189
NUP188	-0.428612
ZNF398	-0.429739
ILKAP	-0.42988
VCP	-0.430021
CTU2	-0.430162
POLR2F	-0.432135
SRSF4	-0.432981
EYA3	-0.433545
MARCH1	-0.434109
ACACA	-0.4358
CROCC	-0.436082
MICA	-0.436223
WDR77	-0.437914
SRRM1	-0.438055
IFFO2	-0.438619
KIF18B	-0.439183
MRPL37	-0.439605
LIG3	-0.441156
PHACTR4	-0.444961
RCC1L	-0.447075
TANGO6	-0.447357
RBM28	-0.448626
PRPF38A	-0.448908
SLFN12	-0.451445
HNRNPR	-0.453559
ELOA	-0.4537
TRRAP	-0.453982
GPAM	-0.45666
NT5C3B	-0.457364
FAM136A	-0.459901
PRDX1	-0.462297
PLEKHM2	-0.462579
NUDC	-0.462861
MAST2	-0.463002
ERI3	-0.463707
POM121C	-0.46413
DNAJC8	-0.466667
AP2B1	-0.467653
PAQR3	-0.469486
NOL6	-0.471177
WASF1	-0.472586
DDX51	-0.478224
POMT1	-0.479493
ZNF286A	-0.480338
PGAM5	-0.481184
KPNA6	-0.481325
ANKRD13B	-0.482171
PPP1R8	-0.482311
PRMT6	-0.483721
SZRD1	-0.487808
ZNF593	-0.490063
SRRT	-0.490345
DDI2	-0.493164
C1orf109	-0.50007
ZDHHC18	-0.500352
KDM1A	-0.501903
NLE1	-0.503312
MIIP	-0.504722
SNRNP40	-0.505567
EMC1	-0.508809
SLFN11	-0.510359
EIF2B4	-0.510923
CEP85	-0.516843
TUBGCP4	-0.5284
MRTO4	-0.530374
UBR4	-0.530937
SELENON	-0.545595
MZT2B	-0.552784
GPN2	-0.571529
RCC1	-0.639464

## Sheet: 5FU profile
Table S5D.
Genes correlated to 5-FU sensitivity in PDOs
symbol	rho
PTPRN2	0.501013
TSC2	0.476866
COL16A1	0.469897
VWA2	0.453205
SKP1	0.444616
CCDC24	0.431975
ABHD11	0.431489
PDLIM7	0.427113
ENPP4	0.425816
ZBTB46	0.419982
FBXL17	0.412851
PAPD4	0.412527
ZNF888	0.411393
PDGFB	0.405721
SORL1	0.401183
FCHSD1	0.399076
SLC27A1	0.397456
SERPINA5	0.397456
CNOT8	0.396807
BMP4	0.395997
ZNF593	-0.396969
VPS51	-0.397618
ZBTB5	-0.398266
ROBO1	-0.398588
ID1	-0.39859
RPL10A	-0.402155
ACTG1	-0.40248
PRRC2C	-0.40329
RPS9	-0.403938
EEF1G	-0.404748
RPL37A	-0.406045
SF3B5	-0.406531
TRABD	-0.407341
GTPBP1	-0.407666
RAB3B	-0.411879
RPL13	-0.413176
RPL29	-0.413824
TMEM18	-0.414148
SERAC1	-0.415282
KRT13	-0.417065
PIM3	-0.417551
HMGXB4	-0.41901
PSAT1	-0.419658
SELENOO	-0.419982
CRELD2	-0.420144
RPL32	-0.422575
EEF1B2	-0.427923
SPAG9	-0.42922
EWSR1	-0.432785
RPS17	-0.434892
RRP7A	-0.435216
KIDINS220	-0.43635
TMEM189-UBE2V1	-0.438457
RPS6	-0.438619
MYC	-0.438943
A4GALT	-0.439267
SLC25A1	-0.439754
DDIT4	-0.444129
SBF1	-0.444778
KLF4	-0.451584
RPL19	-0.453691
ID3	-0.456608
PPP6R2	-0.459849
REG4	-0.462118
LONP1	-0.471032
TRAF4	-0.47638
VPS25	-0.478162
EIF3L	-0.483186
RPL11	-0.486103
RPL23A	-0.489507
GRAMD4	-0.490317
RPL38	-0.494044
MCAT	-0.49923
SFMBT2	-0.502393
RBFOX2	-0.504578
ALG12	-0.505064
PRR14L	-0.517543
RPL27	-0.538449
EIF3D	-0.574265
SCO2	-0.576696
ZBED4	-0.59825
BRD1	-0.637631

## Sheet: OXA profile
Table S5E.
Genes correlated to oxaliplatin sensitivity in PDOs
symbol	rho
BBX	0.594251
MMADHC	0.53885
PJA2	0.523693
PHF21A	0.519686
SLC35F5	0.517422
STAM2	0.50993
STAT2	0.507317
TPBG	0.506272
PLEKHA2	0.503136
ALDH6A1	0.502439
ZBTB4	0.499129
ACSL3	0.499129
HIVEP2	0.49547
SLC2A10	0.491638
IKZF2	0.485714
MTX2	0.483972
PTK6	0.478049
ZNF888	0.473519
ARL1	0.467944
CCDC115	0.463066
NLGN2	0.455749
PACS1	0.455226
HSPA13	0.454007
TMEM65	0.453833
PPP1R9A	0.45122
RILPL2	0.449477
SBNO2	0.448258
ARL3	0.447387
SCYL1	0.44669
TBCA	0.445645
SP140L	0.444599
MLLT10	0.443902
CEP70	0.44338
WARS	0.440941
NAB2	0.440767
CLIP1	0.437979
IRF2BPL	0.436934
KMT5A	0.43676
ALCAM	0.434146
SCYL2	0.433101
RBMS1	0.431882
IRF5	0.429965
BAD	0.429617
VEGFB	0.426481
TGM2	0.426481
ATXN2	0.426481
TMEM263	0.426132
MBNL1	0.425958
IFI44L	0.423868
HOXA3	0.4223
DNAJC4	0.420209
CASD1	0.420209
DNAJB9	0.420035
RAB5B	0.419686
GFM2	0.419338
PPA2	0.418467
UBE2W	0.417247
TRIM8	0.416376
ALDH1L2	0.415505
SNX21	0.415505
COQ10B	0.414634
RAB6A	0.41446
SERTAD3	0.414286
FYTTD1	0.414286
ACTR3	0.412369
ANKRA2	0.412195
SGSM2	0.412021
GLRB	0.411918
ZNF347	0.409513
CCDC91	0.409408
SYVN1	0.408711
PC	0.408014
TCIRG1	0.406969
TMEM41B	0.406272
TIAM1	0.405401
STK17B	0.404181
NAMPT	0.403136
LAMA5	0.402613
P2RX4	0.401045
DOK7	0.400697
ANKRD13B	-0.400174
USH1C	-0.400348
GJB1	-0.400348
TUBB2A	-0.400523
PRDX4	-0.401045
CHDH	-0.401394
BYSL	-0.402091
MMD	-0.402962
SLC5A1	-0.404181
MYEF2	-0.405749
CLN6	-0.406098
EDN1	-0.406969
NOL8	-0.407317
PTPRB	-0.407317
ABCF1	-0.407666
SCFD2	-0.40784
MISP	-0.40784
METTL13	-0.409408
PRC1	-0.409582
NRCAM	-0.40993
PPM1D	-0.410279
WDR73	-0.41115
SP2	-0.412544
LRRC1	-0.413066
HNF4A	-0.415157
ZFR	-0.415505
TSR2	-0.417422
TUBGCP4	-0.41899
C1orf226	-0.421429
FAM13B	-0.4223
OGFOD1	-0.422648
IRF8	-0.424042
GDA	-0.424913
EFTUD2	-0.425261
CCDC198	-0.425367
GPATCH4	-0.425958
UBD	-0.426307
TMEM176B	-0.426325
DPM2	-0.427526
XPO5	-0.4277
TRABD2A	-0.42892
ANKS6	-0.430662
ABCC10	-0.431533
ZSCAN12	-0.432578
FKBP9	-0.435366
KIF18B	-0.436063
SUSD1	-0.439199
C1orf131	-0.441463
GCOM1	-0.441986
TMEM176A	-0.443631
NAV1	-0.444425
DNAJC15	-0.445645
JADE3	-0.445819
GTF3A	-0.446341
DIEXF	-0.446516
BLM	-0.447561
CISD3	-0.447909
PLEK2	-0.448606
APRT	-0.449129
LAS1L	-0.450697
EPCAM	-0.450871
FAAH	-0.452613
HR	-0.454181
TLN2	-0.455749
COG8	-0.455923
DDX52	-0.457666
POP1	-0.459059
TUBB2B	-0.459059
CTSE	-0.460453
SFXN5	-0.461847
SYK	-0.463589
AXIN2	-0.465854
HSD17B2	-0.466202
PRPS2	-0.466376
GNL3L	-0.466899
GLB1L2	-0.467073
SECISBP2	-0.473868
AKAP1	-0.473868
RCCD1	-0.47439
C3orf14	-0.480558
MAPKAP1	-0.48101
TNIK	-0.486934
KLHL25	-0.487456
FANCI	-0.487631
KIAA1549L	-0.490767
VIL1	-0.491289
DOK1	-0.494425
MYZAP	-0.495645
OSBPL7	-0.502091
AEN	-0.50662
RNF20	-0.507491
ARRDC4	-0.508188
MRPL50	-0.516725
ABHD2	-0.523171
KCNK5	-0.529617
VPS33B	-0.537805
PDX1	-0.543206
RBM15	-0.558885
