# Supplementary material for: Organoid Profiling Identifies Common Responders to Chemotherapy in Pancreatic Cancer
Source: Oxford University Press journal article supplement (doi:10.1158/2159-8290.cd-18-0349), 2018-05-31
Supplement: 21598290cd180349-sup-199398_2_supp_4775186_p95dln.xlsx [file 21598290cd180349-sup-199398_2_supp_4775186_p95dln.xlsx]

## Sheet: Key
Table S1
S1A. Patient-Derived Organoid Cohort Sheet
	Demographic, and tumor stage information for patients with an associated PDO model. Available dataset for each PDO is indicated.
	A: Asian
	AA: African American
	H: Hispanic
	W: White, Caucasian
S1B. PDAC Core Gene Distribution
	Alterations and allele frequencies in core PDAC genes
	KEY
	DEEP LOSS = LOG(2) <-3
	LOSS = LOG(2) < -0.8
	Mutant
	af: allele frequency
	HET: <80% af
	HOMO: >80% af
S1C. PDAC Core Gene Summary
	The number and percentage of PDO cultures that are single or compound mutant for the core PDAC genes
S1D. PDAC Core Gene Overlap Sheet
	WGS on 13 matched patient tumor and PDO specimens showing the allele frequencies of genetic alterations detected in the 4 most frequently altered genes in PDAC, KRAS, TP53, CDKN2A and SMAD4.
	Allele frequencies are indicated in parentheses
	Evidence, but not called indicates that there were insufficient reads to independently call the mutation in the primary tumor specimen.

## Sheet: Patient-Derived Organoid Cohort
Table S1A
#	Patient number	Organoid	Site	Type of Sample	Sex	Age	Race	Stage	Tumor	KRAS Allele Frequencies	WES	WES passage	WGS	WGS passage	RNAseq	RNAseq passage	Chemo	Chemo passage	Targeted	Targeted passage	Treatment prior to organoid
1	1	hT1	Pancreas	Resection	M	65	W	2B	YES	G12V 39%	YES	25	NO		YES	17	YES	20, 22	YES	20, 22	NO
2	2	hT3	Pancreas	Resection	M	35	W	4	YES	G12V 66%	YES	22	NO		YES	2, 12	YES	5, 8	YES	8	YES
3	3	hT25	Pancreas	Resection	F	61	W	2B	YES	G12V 58%	YES	16	NO		YES	9	YES	6, 9	YES	15	NO
4	4	hT30	Pancreas	Resection	M	67	W	2B	YES	Q61H 95%	YES	32	YES	5	YES	31	YES	29	YES	35	NO
5	5	hT44	Pancreas	Resection	M	68	W	2B	YES	G12V 50%	YES	18	NO		NO		YES	9	YES	17	NO
6	6	hT48	Pancreas	Resection	M	76	W	2B	YES	G12D 53%	YES	10	NO		YES	12	YES	8, 14	YES	14	NO
7	7	hT58	Pancreas	Resection	M	50	H	N/A	YES	G12D 50%	YES	9	NO		NO		YES	8	YES	8	NO
8	8	hT60	Pancreas	Resection	M	57	N/A	N/A	YES	G12D 72%	YES	12	NO		YES	9	YES	5	YES	11	NO
9	9	hT64	Pancreas	Resection	F	79	W	2B	YES	G12D 54%	YES	6	NO		YES	8	YES	12	YES	13	NO
10	10	hT81	Pancreas	Resection	M	66	W	2B	YES	G12V 64%	YES	10	YES	10	YES	9	YES	2, 7	YES	10	NO
11	11	hT82	Pancreas	Resection	F	78	W	2A	YES	G12V 48%	YES	15	YES	9	YES	11	YES	8, 10	YES	8, 10	NO
12	12	hT83	Pancreas	Resection	F	45	W	2B	YES	G12R 22%	YES	1	NO		NO		YES	2	NO		NO
13	13	hT85	Pancreas	Resection	M	76	AA	2B	YES	G12D 100%	YES	14	YES	11	YES	7	YES	9, 13	YES	9, 13	NO
14	14	hT87	Pancreas	Resection	M	72	W	2B	YES	G12D 56%	YES	4	YES	4	NO		YES	16	YES	16	NO
15	14	hT88	Pancreas	Resection	M	72	W	2B	YES	G12D 38%	YES	5	NO		NO		NO		NO		NO
16	15	hT89	Pancreas Head	Resection	F	51	H	3	YES	G12D 52%	YES	17	NO		YES	10	YES	11	YES	11	NO
17	16	hT91	Pancreas	Resection	F	71	W	2B	YES	G12D 54%	YES	10	YES	10	YES	8	YES	7, 14	YES	14	NO
18	17	hT93	Pancreas	Resection	M	55	W	2B	YES	G12V 47%	YES	10	YES	8	YES	4	YES	4, 12	YES	12	NO
19	18	hT96	Pancreas Tail	Resection	M	54	W	2B	YES	G12V 41 %	YES	15	NO		NO		NO		YES	8	NO
20	19	hT98	Pancreas	Resection	F	89	W	2B	YES	G12D 89%	YES	5	YES	5	YES	7	YES	6, 7	YES	6, 7	NO
21	20	hT101	Pancreas	Resection	F	73	W	2B	YES	G12V 46%	YES	9	YES	6	YES	7	YES	6	YES	6	NO
22	21	hT102	Pancreas	Resection	M	67	W	2A	YES	WT	YES	9	YES	9	YES	10	YES	8	YES	8	NO
23	22	hT103	Pancreas	Resection	M	87	W	2B	YES	G12V 35%	YES	13	NO		NO		YES	13	YES	13	NO
24	23	hT105	Pancreas Head	Resection	F	65	W	2B	YES	G12D 63%	YES	7	NO		YES	5	YES	5	YES	5	NO
25	24	hT106	Pancreas	Resection	F	70	W	2B	YES	G12R 59%	YES	12	NO		NO		YES	11	YES	11	NO
26	25	hT108	Pancreas	Resection	F	75	W	2B	YES	G12D 55%	YES	8	YES	8	YES	8	YES	7	YES	7	NO
27	26	hT117	Pancreas Head	Resection	M	73	W	1B	YES	G12V (53%)	NO		YES	7	YES	7	YES	6	YES	6	NO
28	27	hT123	Pancreas	Resection	M	81	W	2B	YES	G12V 59%	YES	5	YES	5	YES	6	YES	4	YES	4	NO
29	28	hT125	Pancreas	Resection	M	75	W	2B	YES	G12V 47%	YES	7	NO		NO		YES	6	YES	6	NO
30	29	hT127	Pancreas	Resection	M	80	W	2A	YES	Q61H 65%	YES	7	NO		YES	7	YES	6	YES	6	NO
31	30	hT133	Pancreas	Resection	M	79	AA	2B	YES	G12V 48%	YES	9	NO		NO		YES	8	YES	8	NO
32	31	hT134	Pancreas	Resection	N/A	N/A	N/A	2A	YES	G12D 63%	YES	7	NO		NO		YES	5, 7	YES	5	NO
33	32	hF2	Pancreas	FNA	F	60	W	4	YES	G12V 51%	YES	28	YES	13	YES	22, 28	YES	25, 27	YES	25, 27	NO
34	33	hF3	Pancreas	EUS FNA	F	69	A	3	YES	G12V 46%	YES	12	YES	8	YES	13, 14	YES	11, 13	YES	13	NO
35	34	hF23	Pancreas	EUS FNA	F	69	AA	3	YES	G12D 34 %	YES	18	YES	18	YES	20	YES	16, 23	YES	23	NO
36	35	hF24	Pancreas	EUS FNA	F	57	W	4	YES	G12V 82%	YES	26	YES	26	YES	23	YES	9, 30	YES	30	NO
37	36	hF27	Pancreas	EUS FNA	M	54	H	2B	YES	G12D 65%	YES	24	YES	24	YES	20	YES	20, 27	YES	20	NO
38	37	hF28	Pancreas Head	EUS FNA	F	84	W	4	YES	G12D 46%	YES	11	NO		YES	10	YES	9	YES	9	NO
39	38	hF31	Pancreas	EUS FNA	M	74	W	2A	YES	G12D 53%	YES	16	NO		YES	6	YES	7	YES	9	NO
40	39	hF32	Pancreas	EUS FNA	F	76	W	4	YES	G12D 37%	YES	8	NO		YES	8	YES	2, 12	YES	12	NO
41	9	hF34	Pancreas	FNA	F	79	W	2B	YES	G12V 54%	YES	13	NO		YES	15	NO		NO		NO
42	40	hF39	Pancreas	EUS FNA	F	81	W	3	YES	WT	YES	4	NO		YES	10	YES	2	YES	11	NO
43	41	hM8	Pancreas	FNA	F	70	W	3	YES	G12R 47%	YES	17	NO		YES	15	YES	11, 16	YES	17	NO
44	42	hF43	Pancreas	EUS FNA	F	76	W	2A	YES	WT	YES	3	NO		YES	1	YES	3	YES	3	NO
45	43	hF44	Pancreas Head	FNA	M	68	W	4	YES	G12D 48%	YES	16	YES	12	YES	10	YES	3, 9, 11	YES	9	NO
46	44	hF45	Pancreas	EUS FNA	M	64	AA	2A	YES	G12D 48%	YES	12	NO		NO		YES	11	YES	11	NO
47	45	hF50	Pancreas Body & Tail	FNA	F	87	W	2B	YES	G12V/G12R 51/46%	YES	7	YES	7	YES	7	YES	6	YES	6	NO
48	46	hF54	pancreas	FNA	M	55	AA	N/A	YES	G12D 51%	YES	11	NO		NO		YES	10	YES	10	NO
49	47	hF57	Pancreas Tail	FNA	F	62	W	3	YES	G12V 45%	YES	7	NO		YES	6	YES	6	YES	6	NO
50	48	hF68	Liver	Core Biopsy	M	55	W	4	YES	G12V 62%	YES	6	NO		NO		YES	3	YES	5	NO
51	49	hF70	Liver	FNB	M	82	W	4	YES	G12D/G179S 73/80%	YES	6	NO		NO		YES	6	YES	6	NO
52	50	hF71	Omentum	FNB	M	89	W	4	YES	G12D 73%	YES	6	NO		NO		YES	5	YES	5	NO
53	51	hF72	Pancreas	FNA	M	72	W	4	YES	G12D 100%	YES	8	YES	8	NO		YES	6	YES	6	NO
54	52	hF74	Pancreas Head	FNA	M	70	W	3	YES	G12V 52%	YES	8	YES	8	NO		YES	3	YES	6	NO
55	53	hF77	Pancreas	FNA	M	92	W	4	YES	G12V 37%	YES	7	NO		NO		YES	6	YES	6	NO
56	54	hF78	Liver	FNB	F	66	W	4	YES	G12V 30%	YES	5	NO		NO		YES	4	YES	4	NO
57	55	hF81	Liver	FNA	M	65	A	2B	YES	G12V 42%	YES	8	NO		NO		YES	7	YES	7	NO
58	56	hF82	Pancreas	FNA	F	75	W	4	YES	G12D 53%	YES	4	NO		NO		YES	4	YES	4	NO
59	57	hM1A	Lung	VATS Resection	M	52	W	4	YES	G12D 55%	YES	15	NO		YES	12	YES	17	YES	17	YES
60	57	hM1E	Lung	FNA	M	55	W	4	YES	G12D 61%	YES	9	NO		YES	27	YES	22, 28	YES	28	YES
61	57	hM1F	Lung	RAP	M	55	W	4	YES	G12D 73%	YES	9	NO		YES	23	YES	18, 24	YES	24	YES
62	58	hM17D	Ascites	RAP	M	64	W	4	YES	G12R 47%	YES	6	NO		YES	6	YES	5, 15	YES	15	YES
63	59	hM19A	Liver	RAP	M	43	W	4	YES	G12V 91%	YES	5	NO		YES	6	YES	5	YES	5	YES
64	59	hM19B	Liver	RAP	M	43	W	4	YES	G12V 91%	YES	6	NO		YES	5	YES	4	YES	4	YES
65	59	hM19C	Diaphragm	RAP	M	43	W	4	YES	G12V 90%	YES	5	NO		YES	5	YES	4	YES	4	YES
66	59	hM19D	Ascites	RAP	M	43	W	4	YES	G12V 91%	YES	5	NO		YES	5	YES	4	YES	4	YES
67	60	hM21C	Chest	RAP	F	58	W	4	YES	G12V	KRAS only		NO		NO		YES	5	YES	5	YES
68	60	hM21D	Chest	RAP	F	58	W	4	YES	G12V	KRAS only		NO		NO		YES	3	YES	5	YES
69	60	hM21F	Diaphragm	RAP	F	58	W	4	YES	G12D	KRAS only		NO		NO		YES	4	YES	4	YES
70	61	hN30	Pancreas	RAP	M	49	W	Normal	NO	WT	YES	1	NO		YES	2	NO		NO		NO
71	62	hN31	Pancreas	RAP	F	62	AA	Normal	NO	WT	YES	1	NO		YES	2	NO		NO		NO
72	63	hN32	Pancreas	RAP	M	24	W	Normal	NO	WT	YES	1	NO		YES	2	NO		NO		NO
73	64	hN33	Pancreas	RAP	M	28	W	Normal	NO	WT	YES	1	NO		YES	2	NO		NO		NO
74	65	hN34	Pancreas	RAP	F	43	W	Normal	NO	WT	YES	1	NO		YES	2	NO		NO		NO
75	66	hN35	Pancreas	RAP	F	62	W	Normal	NO	WT	YES	1	NO		YES	2	NO		NO		NO
76	67	hN36	Pancreas	RAP	F	50	W	Normal	NO	WT	YES	1	NO		YES	2	NO		NO		NO
77	68	hN37	Pancreas	RAP	F	60	W	Normal	NO	WT	YES	1	NO		YES	2	NO		NO		NO
78	69	hN38	Pancreas	RAP	M	52	H	Normal	NO	WT	YES	1	NO		YES	2	NO		NO		NO
79	70	hN39	Pancreas	RAP	M	53	H	Normal	NO	WT	YES	1	NO		YES	2	NO		NO		NO
80	71	hN40	Pancreas	RAP	M	63	H	Normal	NO	WT	YES	1	NO		YES	2	NO		NO		NO

## Sheet: PDAC Core Gene Distribution
Table S1B
#	Organoid	KRAS	af	TP53	af	SMAD4	af	CDKN2A	af
1	hF2	G12V	51	WT	N/A	DEEP LOSS	N/A	DEEP LOSS	N/A
2	hF3	G12V	46	R273L	98	DEEP LOSS	N/A	R58*	100
3	hF23	G12D	34	R175H	98	P511fs	100	P48fs	100
4	hF24	G12V	82	F113V	100	LOSS	N/A	DEEP LOSS	N/A
5	hF27	G12D	65	R273H	100	G365D	100	LOSS	N/A
6	hF28	G12D	46	F113L	95	Splice site mut	100	Y44*	96
7	hF31	G12D	53	V157F	100	WT	N/A	DEEP LOSS	N/A
8	hF32	G12D	37	Y205fs	100	LOSS	N/A	S12*	96
9	hF34	G12V	54	C242_M243insSC	100	WT	N/A	DEEP LOSS	N/A
10	hF39	WT	N/A	R273H	98	WT	N/A	D153fs	100
11	hF43	WT	N/A	R273H	50	WT	N/A	A80fs/T18_A19del	47/100
12	hF44	G12D	48	R175H	100	LOSS	N/A	LOSS	N/A
13	hF45	G12D	48	R158P	96	WT	N/A	LOSS	N/A
14	hF50	G12V/G12R	51/46	Y236C	100	H405fs	100	WT	N/A
15	hF54	G12D	51	L45fs	100	LOSS	N/A	DEEP LOSS	N/A
16	hF57	G12V	45	R213*	100	LOSS	N/A	LOSS	N/A
17	hF68	G12V	62	V157G	100	LOSS	N/A	DEEP LOSS	N/A
18	hF70	G12D/G179S	73/80	G245S	100	WT	N/A	WT	N/A
19	hF71	G12D	73	Splice site mut	100	LOSS	N/A	WT	N/A
20	hF72	G12D	100	R273C	100	WT	N/A	DEEP LOSS	N/A
21	hF74	G12V	52	WT	N/A	LOSS	N/A	DEEP LOSS	N/A
22	hF77	G12V	37	G244V	100	LOSS	N/A	R80*	98
23	hF78	G12V	30	R273C	97	WT	N/A	LOSS	N/A
24	hF81	G12V	42	V157F	100	WT	N/A	R80*	100
25	hF82	G12D	53	R337C	100	WT	N/A	WT	N/A
26	hM1A	G12D	55	R175H	100	WT	N/A	WT	N/A
27	hM1E	G12D	61	R175H	98	WT	N/A	LOSS	N/A
28	hM1F	G12D	73	R175H	100	WT	N/A	WT	N/A
29	hM8	G12R	47	LOSS	N/A	LOSS	N/A	DEEP LOSS	N/A
30	hM17D	G12R	47	I162fs	100	Y412*	100	WT	N/A
31	hM19A	G12V	91	E298*	96	WT	N/A	DEEP LOSS	N/A
32	hM19B	G12V	91	E298*	100	WT	N/A	DEEP LOSS	N/A
33	hM19C	G12V	90	E298*	100	WT	N/A	DEEP LOSS	N/A
34	hM19D	G12V	91	E298*	100	WT	N/A	DEEP LOSS	N/A
35	hT1	G12V	39	R213*	100	WT	N/A	DEEP LOSS	N/A
36	hT3	G12V	66	LOSS	N/A	WT	N/A	DEEP LOSS	N/A
37	hT25	G12V	58	R273H	96	WT	N/A	DEEP LOSS	N/A
38	hT30	Q61H	95	A161P/I162S	98/98	D537G	96	DEEP LOSS	N/A
39	hT44	G12V	50	l194F	94	WT	N/A	WT	N/A
40	hT48	G12D	53	P151T	95	WT	N/A	LOSS	N/A
41	hT58	G12D	50	WT	N/A	Q289*	100	WT	N/A
42	hT60	G12D	72	H193D	100	LOSS	N/A	Y44fs	100
43	hT64	G12D	54	C242_M243insSC	100	WT	N/A	DEEP LOSS	N/A
44	hT81	G12V	64	R248W	100	R361C	90	DEEP LOSS	N/A
45	hT82	G12V	48	I162fs	100	LOSS	N/A	L16fs	100
46	hT83	G12R	22	WT	N/A	WT	N/A	WT	N/A
47	hT85	G12D	100	P36fs	100	LOSS	N/A	R139L	100
48	hT87	G12D	56	WT	N/A	R135*	100	WT	N/A
49	hT88	G12D	38	WT	N/A	R135*	100	WT	N/A
50	hT89	G12D	52	C275Y	100	WT	N/A	LOSS	N/A
51	hT91	G12D	54	T155N	97	WT	N/A	WT	N/A
52	hT93	G12V	47	G154fs	47	P356S	81	R58*	84
53	hT96	G12V	41	R175H	100	WT	N/A	M2fs	36
54	hT98	G12D	89	M237I	100	DEEP LOSS	N/A	R80*	98
55	hT101	G12V	46	P250L	100	LOSS	N/A	D108fs	100
56	hT102	WT	N/A	Y220C	95	WT	N/A	WT	N/A
57	hT103	G12V	35	R213*	100	WT	N/A	LOSS	N/A
58	hT105	G12D	63	P142fs	100	DEEP LOSS	N/A	DEEP LOSS	N/A
59	hT106	G12R	59	splice site mut	100	WT	N/A	LOSS	N/A
60	hT108	G12D	55	P98fs	100	WT	N/A	D108fs	97
61	hT117	G12V	53	R175H	100	WT	N/A	DEEP LOSS	N/A
62	hT123	G12V	59	A161T	100	W101*	100	A158fs	100
63	hT125	G12V	47	R110P	100	Y95C	100	LOSS	N/A
64	hT127	Q61H	65	R342*	100	DEEP LOSS	N/A	WT	N/A
65	hT133	G12V	48	C124*	100	WT	N/A	LOSS	N/A
66	hT134	G12D	63	Y220C	100	WT	N/A	LOSS	N/A

## Sheet: PDAC Core Gene Summary
Table S1C
Status	KRAS	%	TP53	%	SMAD4	%	CDKN2A	%		Genotype	Number	%
MUT (HET)	53	80.303	2	3.0303	0	0	1	1.51515		KRAS	1	1.51515
MUT (HOMO)	10	15.1515	56	84.8485	13	19.697	16	24.2424		KRAS, TP53	6	9.09091
WT	3	4.54545	6	9.09091	34	51.5152	15	22.7273		KRAS, TP53, SMAD4	4	6.06061
LOSS	0	0	2	3.0303	14	21.2121	13	19.697		KRAS, TP53, CDKN2A	24	36.3636
DEEP LOSS	0	0	0	0	5	7.57576	21	31.8182		KRAS, TP53, SMAD4, CDKN2A	23	34.8485
Total Altered	63	95.4545	60	90.9091	32	48.4848	51	77.2727		KRAS, SMAD4	3	4.54545
										KRAS, SMAD4, CDKN2A	2	3.0303
										TP53	1	1.51515
										TP53, CDKN2A	2	3.0303

## Sheet: PDAC Core Gene Overlap
Table S1D
ID	Type	Purity	KRAS	TP53	CDKN2A	SMAD4	Overlap?
hT30	Tissue	0.23	Q61H (12%)	A161P (23%)/I162S (19%)	None detected	D537G (16%)	Yes
	Organoid	1	Q61H (100%)	A161P (100%)/I162S (100%)	None detected	D537G (98%)
hT81	Tissue	0.18	Evidence, but not called (5%)	R248W (11%)	None detected	R361C (7%)	Yes
	Organoid	0.99	G12V (60%)	R248W (100%)	None detected	R361C (100%)
hT82	Tissue	0.24	G12V (19%)	Evidence, but not called (8%)	Evidence, but not called (12%)	None detected	Yes
	Organoid	0.99	G12V (40%)	Frame shift (100%)	Frame shift (100%)	None detected
hT85	Tissue	<0.15	G12D (8%)	Evidence, but not called (8%)	Evidence, but not called (5%)	None detected	Yes
	Organoid	0.96	G12D (98%)	Frame shift (100%)	R139L (100%)	None detected
hT87	Tissue	0.27	G12D (14%)	None detected	None detected	Stop gain (10%)	Yes
	Organoid	0.85	G12D (51%)	None detected	None detected	Stop gain (79%)
hT91	Tissue	0.17	G12D (7%)	T155N (10%)	None detected	None detected	Yes
	Organoid	0.98	G12D (46%)	T155N (100%)	None detected	None detected
hT93	Tissue	0.18	Evidence, but not called (5%)	Evidence, but not called (9%)	Stop Gain (10%)	P356S (12%)	Yes
	Organoid	0.92	G12V (46%)	Frame shift (48%)	Stop Gain (88%)	P356S (87%)
hT98	Tissue	0.44	G12D (26%)	M237I (29%)	Stop gain (23%)	None detected	Yes
	Organoid	0.99	G12D (96%)	M237I (100%)	Stop gain (100%)	None detected
hT101	Tissue	0.26	G12V (17%)	P250L (11%)	Evidence, but not called (15%)	None detected	Yes
	Organoid	1	G12V (45%)	P250L (100%)	Frame shift (100%)	None detected
hT102	Tissue	<0.15	None detected	None detected	None detected	None detected	No
	Organoid	1	None detected	Y220C (100%)	None detected	None detected
hT108	Tissue	0.19	G12D (7%)	Evidence, but not called (9%)	None detected	None detected	Yes
	Organoid	1	G12D (57%)	Frame shift (100%)	None detected	None detected
hT117	Tissue	<0.15	None detected	None detected	None detected	None detected	No
	Organoid	0.99	G12V (53%)	R175H (100%)	None detected	None detected
hT123	Tissue	<0.15	G12V (5%)	Evidence, but not called (7%)	Evidence, but not called (2%)	Evidence, but not called (1%)	Yes
	Organoid	0.98	G12V (54%)	A161T (100%)	Frame shift (100%)	Stop gain (100%)
