# Supplementary material for: Organoid Profiling Identifies Common Responders to Chemotherapy in Pancreatic Cancer
Source: Oxford University Press journal article supplement (doi:10.1158/2159-8290.cd-18-0349), 2018-05-31
Supplement: 21598290cd180349-sup-199398_2_supp_4775187_p95dln.xlsx [file 21598290cd180349-sup-199398_2_supp_4775187_p95dln.xlsx]

## Sheet: Key
Table S4 Key
Values shown are for AUC
Color Key:
Resistant
Intermediate
Sensitive

## Sheet: Chemo 
Table S4A
Sample ID	Gemcitabine	Paclitaxel	SN-38	5-FU	Oxaliplatin	Insensitive
hF2	0.554358	0.712962	0.49995	0.782922	0.887246
hF23	0.523995	0.486711	0.54786	0.781999	0.820843
hF24	0.609942	0.742389	0.549167	0.671272	0.809528
hF27	0.677162	0.636766	0.567865	0.838669	0.852603	YES
hF28	0.68501	0.662779	0.651442	0.861745	0.829213	YES
hF3	0.619786	0.544052	0.563543	0.718959	0.946592
hF31	0.61936	0.560775	0.541064	0.760286	0.844383
hF32	0.549507	0.577008	0.616809	0.910582	0.915301
hF39	0.755856	0.699248	0.723407	0.8069	0.817747
hF43	0.614383	0.618259	0.544374	0.833604	0.939964
hF44	0.608138	0.560653	0.558799	0.717838	0.878978
hF45	0.653679	0.680984	0.715255	0.855193	0.918398	YES
hF50	0.637843	0.641315	0.581826	0.722544	0.814589
hF54	0.586569	0.591237	0.56517	0.728	0.852203
hF57	0.682922	0.583587	0.596847	0.745209	0.859123
hF68	0.600543	0.665979	0.621696	0.760693	0.808104
hF70	0.917493	0.759485	0.880286	0.971617	0.98154	YES
hF71	0.575274	0.669058	0.5029	0.750264	0.668468
hF72	0.619077	0.558491	0.54961	0.851777	0.802986
hF74	0.68541	0.599902	0.588699	0.781664	0.796187
hF77	0.743855	0.596951	0.658731	0.764028	0.893167	YES
hF78	0.732814	0.687161	0.680147	0.858538	0.820802
hF81	0.782607	0.633778	0.609675	0.898189	#N/A	YES
hF82	0.687559	0.70671	0.67354	0.889206	0.927072	YES
hM17D	0.637593	0.653709	0.685232	0.827639	0.93196	YES
hM19A	0.745545	0.674024	0.567859	0.841834	0.882458	YES
hM19B	0.737613	0.696131	0.599961	0.915086	0.940396	YES
hM19C	0.672882	0.629885	0.589704	0.664351	0.932191
hM19D	0.695295	0.618305	0.579387	0.603036	#N/A
hM1A	0.592713	0.550084	0.576917	0.642083	0.803348
hM1E	0.690174	0.713734	0.639013	0.686691	0.771786
hM1F	0.720379	0.698259	0.695787	0.838379	0.853609	YES
hM21C	0.625029	0.583976	0.603933	0.810265	0.901105	YES
hM21D	0.674629	0.597612	0.637829	0.754216	0.838391
hM21F	0.67625	0.572703	0.63333	0.787671	0.87047
hM8	0.657654	0.625547	0.64099	0.854682	0.798032
hT1	0.58872	0.566015	0.582218	0.669661	0.893994
hT101	0.62214	0.574767	0.544953	0.652692	0.863402
hT102	0.540939	0.559748	0.550411	0.849644	0.740139
hT103	0.645163	0.633494	0.679608	0.941135	0.846651	YES
hT105	0.621642	0.521299	0.571778	0.802784	0.78331
hT106	0.704431	0.678701	0.734787	0.956049	0.947496	YES
hT108	0.519991	0.546584	0.49561	0.747065	0.772769
hT117	0.639797	0.58723	0.553836	0.596132	0.918873
hT123	0.593327	0.600122	0.569377	0.859449	0.852863
hT125	0.569391	0.610245	0.580583	0.844839	0.759237
hT127	0.735587	0.679923	0.580242	#N/A	0.916687	YES
hT133	0.713453	0.657818	0.639909	0.880542	#N/A	YES
hT134	0.60198	0.577399	0.563546	0.818176	0.937675
hT25	0.647763	0.58999	0.638092	0.90203	0.908123	YES
hT3	0.654315	0.513628	0.566397	0.662199	0.751256
hT30	0.712311	0.659002	0.596769	0.885002	0.908553	YES
hT44	0.577395	0.582112	0.552773	#N/A	0.782474
hT48	0.61591	0.567581	0.565586	0.775076	0.79619
hT58	0.790585	0.828978	0.81634	0.883745	0.85293	YES
hT60	0.618361	0.596346	0.537424	0.804182	0.922189
hT64	0.642794	0.557562	0.58914	0.709887	0.719793
hT81	0.76701	0.723152	0.636391	0.784308	0.928231	YES
hT82	0.597992	0.735318	0.594124	0.642611	0.879899
hT83	0.691586	0.635907	0.636142	0.840244	0.895986	YES
hT85	0.543209	0.577297	0.53049	0.618315	0.778844
hT87	0.613192	0.665244	0.563604	0.789533	0.771563
hT89	0.764546	0.731248	0.698375	0.926355	0.874661	YES
hT91	0.72178	0.572301	0.56389	0.744878	0.91698
hT93	0.695868	0.562311	0.610278	0.866821	0.855662
hT98	0.594688	0.541733	0.527709	0.861752	0.82673

## Sheet: Targeted
Table S4B
Sample ID	Selumetinib	Afatinib	Bortezomib	Lapatinib	Sunitinib	Olaparib	Nutlin-3	MK-2206	KU-55933	Everolimus	Celecoxib	Ruxolitinib	SB5225334	SGI-1776	OSI-420	TPCA-1	LY2874455	SF1670	K-ras(G12C) Inhibitor 9	WIKI4	Disulfuram
hF2	0.728	0.772	0.25	0.75	0.74	0.716	0.8	0.756	0.812	0.83	0.874	0.86	0.786	0.788	0.806	0.784	0.654	0.734	0.824	0.698	0.538
hF23	0.692	0.548	0.232	0.762	0.814	0.856	0.928	0.752	0.876	0.728	0.928	0.848	0.748	0.844	0.7	0.764	0.63	0.776	0.85	0.838	0.516
hF24	0.758	0.632	0.238	0.862	0.916	0.854	0.91	0.78	0.842	0.636	0.846	0.9	0.838	0.862	0.798	0.838	0.678	0.854	0.83	0.858	0.578
hF27	0.816	0.828	0.274	0.816	0.78	0.854	0.872	0.798	0.786	0.764	0.798	0.862	0.828	0.854	0.794	0.74	0.722	0.696	0.818	0.798	0.572
hF28	0.7	0.668	0.236	0.842	0.844	0.838	0.856	0.768	0.866	0.75	0.89	0.886	0.668	0.794	0.838	0.824	0.57	0.766	0.826	0.818	0.47
hF3	0.74	0.586	0.25	0.766	0.82	0.89	0.844	0.812	0.868	0.806	0.918	0.89	0.9	0.892	0.796	0.858	0.678	0.852	0.848	0.766	0.558
hF31	0.822	0.606	0.262	0.818	0.808	0.908	0.838	0.808	0.84	0.712	0.878	0.9	0.812	0.872	0.796	0.814	0.644	0.84	0.788	0.796	0.51
hF32	0.774	0.666	0.342	0.806	0.832	0.912	0.774	0.79	0.802	0.74	0.88	0.838	0.83	0.836	0.798	0.802	0.64	0.77	0.808	0.74	0.546
hF39	0.876	0.698	0.304	0.9	0.876	0.87	0.894	0.792	0.874	0.81	0.886	0.77	0.792	0.88	0.892	0.878	0.686	0.814	0.936	0.858	0.562
hF43	0.774	0.81	0.278	0.876	0.798	0.93	0.858	0.714	0.852	0.634	0.862	0.908	0.746	0.786	0.864	0.894	0.676	0.754	0.848	0.878	0.53
hF44	0.724	0.77	0.24	0.804	0.79	0.83	0.85	0.726	0.858	0.614	0.784	0.856	0.808	0.78	0.804	0.87	0.682	0.782	0.79	0.816	0.544
hF45	0.814	0.698	0.256	0.742	0.8	0.816	0.856	0.764	0.872	0.864	0.86	0.82	0.842	0.77	0.828	0.812	0.698	0.794	0.792	0.846	0.554
hF50	0.906	0.668	0.304	0.648	0.736	0.802	0.716	0.698	0.658	0.696	0.898	0.834	0.722	0.73	0.842	0.768	0.76	0.74	0.79	0.758	0.566
hF54	0.576	0.55	0.266	0.776	0.828	0.858	0.894	0.89	0.918	0.796	0.908	0.896	0.808	0.842	0.764	0.822	0.684	0.796	0.908	0.902	0.498
hF57	0.712	0.642	0.264	0.744	0.712	0.794	0.826	0.774	0.81	0.816	0.896	0.782	0.734	0.85	0.676	0.778	0.638	0.826	0.682	0.816	0.674
hF68	0.81	0.776	0.274	0.788	0.858	0.808	0.858	0.696	0.804	0.79	0.788	0.802	0.75	0.796	0.71	0.798	0.772	0.816	0.872	0.746	0.536
hF70	0.802	0.844	0.274	0.796	0.804	0.866	0.88	0.792	0.83	0.724	0.746	0.888	0.768	0.798	0.826	0.882	0.764	0.798	0.832	0.882	0.564
hF71	0.856	0.768	0.298	0.776	0.888	0.89	0.85	0.878	0.878	0.81	0.85	0.87	0.8	0.846	0.83	0.91	0.8	0.8	0.83	0.88	0.57
hF72	0.826	0.782	0.238	0.792	0.852	0.756	0.892	0.794	0.762	0.838	0.83	0.762	0.84	0.758	0.66	0.846	0.65	0.8	0.848	0.916	0.56
hF74	0.786	0.696	0.236	0.882	0.838	0.876	0.71	0.87	0.828	0.832	0.906	0.844	0.81	0.87	0.74	0.886	0.69	0.826	0.83	0.904	0.554
hF77	0.786	0.722	0.264	0.856	0.858	0.834	0.816	0.796	0.826	0.894	0.84	0.9	0.666	0.768	0.824	0.84	0.662	0.894	0.816	0.746	0.534
hF78	0.856	0.68	0.276	0.822	0.904	0.922	0.92	0.868	0.87	0.806	0.832	0.89	0.82	0.886	0.82	0.928	0.738	0.86	0.864	0.91	0.56
hF81	0.55	0.662	0.246	0.704	0.76	0.758	0.814	0.644	0.82	0.866	0.866	0.79	0.732	0.726	0.69	0.812	0.652	0.776	0.686	0.646	0.434
hF82	0.79	0.806	0.372	0.862	0.896	0.872	0.86	0.844	0.856	0.766	0.83	0.798	0.768	0.804	0.834	0.89	0.66	0.794	0.838	0.82	0.558
hM17D	0.77	0.792	0.31	0.828	0.79	0.8	0.868	0.786	0.864	0.728	0.856	0.862	0.774	0.682	0.852	0.81	0.728	0.772	0.8	0.756	0.576
hM19A	0.812	0.766	0.256	0.852	0.876	0.81	0.908	0.852	0.944	0.792	0.894	0.904	0.858	0.836	0.862	0.832	0.722	0.866	0.86	0.848	0.532
hM19B	0.862	0.86	0.262	0.88	0.896	0.898	0.96	0.874	0.916	0.748	0.928	0.92	0.866	0.884	0.898	0.886	0.81	0.826	0.92	0.882	0.544
hM19C	0.836	0.792	0.264	0.828	0.868	0.88	0.906	0.766	0.896	0.678	0.848	0.906	0.718	0.866	0.832	0.904	0.81	0.734	0.824	0.836	0.604
hM19D	0.83	0.816	0.264	0.716	0.742	0.778	0.826	0.718	0.88	0.88	0.786	0.824	0.724	0.73	0.798	0.742	0.576	0.72	0.82	0.806	0.618
hM1A	0.802	0.778	0.262	0.764	0.878	0.838	0.858	0.728	0.906	0.788	0.894	0.904	0.864	0.878	0.764	0.822	0.77	0.844	0.808	0.776	0.518
hM1E	0.768	0.656	0.29	0.776	0.818	0.86	0.84	0.85	0.872	0.668	0.91	0.89	0.854	0.802	0.772	0.794	0.632	0.834	0.83	0.88	0.49
hM1F	0.786	0.686	0.436	0.816	0.838	0.864	0.922	0.87	0.908	0.64	0.868	0.872	0.828	0.806	0.88	0.842	0.696	0.864	0.874	0.91	0.542
hM21C	0.836	0.672	0.248	0.842	0.754	0.766	0.908	0.882	0.902	0.844	0.884	0.884	0.746	0.778	0.732	0.802	0.76	0.748	0.828	0.852	0.538
hM21D	0.786	0.64	0.29	0.804	0.8	0.936	0.918	0.85	0.828	0.864	0.834	0.86	0.702	0.822	0.8	0.836	0.746	0.832	0.852	0.878	0.5
hM21F	0.8	0.516	0.256	0.79	0.824	0.88	0.922	0.794	0.894	0.706	0.852	0.854	0.762	0.848	0.716	0.814	0.724	0.842	0.872	0.83	0.554
hM8	0.772	0.67	0.262	0.84	0.756	0.91	0.818	0.77	0.844	0.77	0.834	0.88	0.822	0.752	0.79	0.82	0.668	0.862	0.874	0.808	0.55
hT1	0.802	0.75	0.252	0.814	0.862	0.868	0.842	0.79	0.786	0.728	0.896	0.868	0.822	0.78	0.776	0.8	0.546	0.594	0.708	0.786	0.516
hT101	0.79	0.73	0.232	0.834	0.832	0.82	0.72	0.884	0.812	0.732	0.722	0.724	0.732	0.804	0.744	0.872	0.546	0.678	0.654	0.644	0.516
hT102	0.816	0.52	0.234	0.72	0.816	0.874	0.842	0.79	0.88	0.744	0.902	0.87	0.774	0.872	0.746	0.816	0.674	0.876	0.868	0.776	0.498
hT103	0.858	0.852	0.26	0.788	0.8	0.772	0.916	0.814	0.862	0.94	0.796	0.794	0.776	0.78	0.866	0.802	0.706	0.69	0.706	0.778	0.526
hT105	0.662	0.558	0.262	0.762	0.75	0.764	0.884	0.822	0.804	0.558	0.808	0.806	0.768	0.902	0.756	0.826	0.582	0.76	0.836	0.84	0.506
hT106	0.692	0.656	0.254	0.842	0.846	0.878	0.812	0.862	0.756	0.736	0.864	0.904	0.69	0.71	0.82	0.772	0.634	0.758	0.814	0.778	0.532
hT108	0.702	0.58	0.248	0.734	0.7	0.644	0.686	0.724	0.732	0.58	0.782	0.802	0.726	0.706	0.706	0.722	0.668	0.624	0.672	0.734	0.386
hT117	0.802	0.75	0.234	0.824	0.862	0.926	0.932	0.854	0.894	0.892	0.912	0.93	0.762	0.898	0.818	0.874	0.78	0.88	0.914	0.81	0.556
hT123	0.88	0.778	0.26	0.89	0.856	0.928	0.856	0.848	0.91	0.744	0.884	0.852	0.864	0.89	0.826	0.844	0.744	0.786	0.866	0.832	0.634
hT125	0.866	0.614	0.24	0.802	0.828	0.872	0.854	0.78	0.86	0.778	0.852	0.876	0.728	0.714	0.704	0.828	0.756	0.76	0.816	0.858	0.534
hT127	0.8	0.842	0.308	0.918	0.864	0.906	0.832	0.862	0.792	0.924	0.896	0.918	0.806	0.808	0.826	0.866	0.744	0.89	0.86	0.944	0.792
hT133	0.704	0.78	0.268	0.69	0.822	0.83	0.886	0.746	0.856	0.742	0.846	0.702	0.788	0.804	0.812	0.698	0.744	0.688	0.866	0.748	0.494
hT134	0.784	0.788	0.25	0.836	0.808	0.806	0.846	0.868	0.788	0.812	0.834	0.876	0.788	0.802	0.786	0.822	0.668	0.894	0.672	0.844	0.548
hT25	0.824	0.792	0.248	0.854	0.85	0.87	0.926	0.83	0.83	0.854	0.906	0.91	0.826	0.868	0.886	0.822	0.748	0.77	0.862	0.834	0.492
hT3	0.736	0.696	0.256	0.698	0.79	0.546	0.766	0.656	0.826	0.758	0.88	0.826	0.742	0.698	0.71	0.724	0.638	0.656	0.806	0.732	0.512
hT30	0.838	0.814	0.35	0.874	0.848	0.936	0.914	0.784	0.938	0.84	0.786	0.894	0.806	0.78	0.858	0.878	0.692	0.786	0.894	0.888	0.58
hT44	0.874	0.794	0.242	0.856	0.848	0.804	0.832	0.804	0.932	0.882	0.898	0.782	0.77	0.726	0.864	0.806	0.644	0.734	0.848	0.828	0.514
hT48	0.744	0.668	0.248	0.736	0.846	0.838	0.836	0.78	0.844	0.718	0.79	0.826	0.744	0.708	0.762	0.78	0.628	0.71	0.838	0.756	0.472
hT58	0.82	0.722	0.454	0.8	0.896	0.898	0.798	0.864	0.936	0.852	0.912	0.836	0.818	0.894	0.832	0.906	0.75	0.816	0.856	0.9	0.522
hT60	0.834	0.718	0.33	0.864	0.882	0.926	0.89	0.812	0.906	0.66	0.928	0.938	0.854	0.866	0.838	0.918	0.678	0.788	0.846	0.904	0.536
hT64	0.766	0.684	0.304	0.616	0.736	0.78	0.864	0.782	0.772	0.83	0.78	0.844	0.74	0.824	0.752	0.822	0.72	0.75	0.8	0.814	0.492
hT81	0.776	0.734	0.26	0.88	0.796	0.906	0.906	0.746	0.888	0.9	0.8	0.92	0.746	0.888	0.824	0.85	0.69	0.892	0.806	0.776	0.536
hT82	0.874	0.704	0.26	0.836	0.858	0.832	0.866	0.856	0.886	0.764	0.904	0.9	0.814	0.844	0.796	0.858	0.658	0.872	0.91	0.822	0.558
hT85	0.674	0.696	0.3	0.83	0.806	0.832	0.88	0.822	0.882	0.744	0.898	0.88	0.808	0.826	0.756	0.872	0.664	0.824	0.784	0.844	0.484
hT87	0.754	0.752	0.26	0.814	0.748	0.8	0.744	0.788	0.754	0.786	0.792	0.778	0.7	0.794	0.866	0.762	0.646	0.776	0.854	0.824	0.476
hT89	0.796	0.846	0.352	0.848	0.718	0.91	0.926	0.738	0.914	0.83	0.914	0.914	0.832	0.79	0.758	0.776	0.768	0.824	0.86	0.792	0.524
hT91	0.842	0.77	0.248	0.872	0.894	0.806	0.838	0.872	0.826	0.854	0.828	0.81	0.63	0.77	0.76	0.792	0.664	0.784	0.858	0.786	0.552
hT93	0.908	0.816	0.262	0.88	0.844	0.844	0.878	0.806	0.898	0.72	0.876	0.876	0.826	0.79	0.844	0.844	0.644	0.79	0.808	0.814	0.52
hT96	0.72	0.708	0.254	0.788	0.79	0.72	0.724	0.768	0.888	0.79	0.714	0.88	0.766	0.796	0.744	0.806	0.618	0.788	0.818	0.792	0.514
hT98	0.678	0.638	0.274	0.806	0.616	0.778	0.764	0.708	0.728	0.606	0.72	0.77	0.68	0.742	0.582	0.686	0.468	0.692	0.646	0.71	0.42

## Sheet: Targeted for Chem-refractory
Table S4C
Sample ID	Basal-like?	Gemcitabine	Paclitaxel	SN-38	5-FU	Oxaliplatin	Selumetinib	Afatinib	Bortezomib	Lapatinib	Sunitinib	Olaparib	Nutlin-3	MK-2206	KU-55933	Everolimus	Celecoxib	Ruxolitinib	SB5225334	SGI-1776	OSI-420	TPCA-1	LY2874455	SF1670	K-ras(G12C) Inhibitor 9	WIKI4	Disulfuram	Alternative?
hF27		0.677162	0.636766	0.567865	0.838669	0.852603	0.816	0.828	0.274	0.816	0.78	0.854	0.872	0.798	0.786	0.764	0.798	0.862	0.828	0.854	0.794	0.74	0.722	0.696	0.818	0.798	0.572	YES
hF28		0.68501	0.662779	0.651442	0.861745	0.829213	0.7	0.668	0.236	0.842	0.844	0.838	0.856	0.768	0.866	0.75	0.89	0.886	0.668	0.794	0.838	0.824	0.57	0.766	0.826	0.818	0.47	YES
hF45		0.653679	0.680984	0.715255	0.855193	0.918398	0.814	0.698	0.256	0.742	0.8	0.816	0.856	0.764	0.872	0.864	0.86	0.82	0.842	0.77	0.828	0.812	0.698	0.794	0.792	0.846	0.554	NO
hF70		0.917493	0.759485	0.880286	0.971617	0.98154	0.802	0.844	0.274	0.796	0.804	0.866	0.88	0.792	0.83	0.724	0.746	0.888	0.768	0.798	0.826	0.882	0.764	0.798	0.832	0.882	0.564	YES
hF77		0.743855	0.596951	0.658731	0.764028	0.893167	0.786	0.722	0.264	0.856	0.858	0.834	0.816	0.796	0.826	0.894	0.84	0.9	0.666	0.768	0.824	0.84	0.662	0.894	0.816	0.746	0.534	YES
hF81		0.782607	0.633778	0.609675	0.898189	#N/A	0.55	0.662	0.246	0.704	0.76	0.758	0.814	0.644	0.82	0.866	0.866	0.79	0.732	0.726	0.69	0.812	0.652	0.776	0.686	0.646	0.434	YES
hF82		0.687559	0.70671	0.67354	0.889206	0.927072	0.79	0.806	0.372	0.862	0.896	0.872	0.86	0.844	0.856	0.766	0.83	0.798	0.768	0.804	0.834	0.89	0.66	0.794	0.838	0.82	0.558	NO
hM17D		0.637593	0.653709	0.685232	0.827639	0.93196	0.77	0.792	0.31	0.828	0.79	0.8	0.868	0.786	0.864	0.728	0.856	0.862	0.774	0.682	0.852	0.81	0.728	0.772	0.8	0.756	0.576	YES
hM19A		0.745545	0.674024	0.567859	0.841834	0.882458	0.812	0.766	0.256	0.852	0.876	0.81	0.908	0.852	0.944	0.792	0.894	0.904	0.858	0.836	0.862	0.832	0.722	0.866	0.86	0.848	0.532	NO
hM19B		0.737613	0.696131	0.599961	0.915086	0.940396	0.862	0.86	0.262	0.88	0.896	0.898	0.96	0.874	0.916	0.748	0.928	0.92	0.866	0.884	0.898	0.886	0.81	0.826	0.92	0.882	0.544	NO
hM1F		0.720379	0.698259	0.695787	0.838379	0.853609	0.786	0.686	0.436	0.816	0.838	0.864	0.922	0.87	0.908	0.64	0.868	0.872	0.828	0.806	0.88	0.842	0.696	0.864	0.874	0.91	0.542	YES
hM21C		0.625029	0.583976	0.603933	0.810265	0.901105	0.836	0.672	0.248	0.842	0.754	0.766	0.908	0.882	0.902	0.844	0.884	0.884	0.746	0.778	0.732	0.802	0.76	0.748	0.828	0.852	0.538	NO
hT103		0.645163	0.633494	0.679608	0.941135	0.846651	0.858	0.852	0.26	0.788	0.8	0.772	0.916	0.814	0.862	0.94	0.796	0.794	0.776	0.78	0.866	0.802	0.706	0.69	0.706	0.778	0.526	YES
hT106		0.704431	0.678701	0.734787	0.956049	0.947496	0.692	0.656	0.254	0.842	0.846	0.878	0.812	0.862	0.756	0.736	0.864	0.904	0.69	0.71	0.82	0.772	0.634	0.758	0.814	0.778	0.532	YES
hT127		0.735587	0.679923	0.580242	#N/A	0.916687	0.8	0.842	0.308	0.918	0.864	0.906	0.832	0.862	0.792	0.924	0.896	0.918	0.806	0.808	0.826	0.866	0.744	0.89	0.86	0.944	0.792	NO
hT133		0.713453	0.657818	0.639909	0.880542	#N/A	0.704	0.78	0.268	0.69	0.822	0.83	0.886	0.746	0.856	0.742	0.846	0.702	0.788	0.804	0.812	0.698	0.744	0.688	0.866	0.748	0.494	YES
hT25		0.647763	0.58999	0.638092	0.90203	0.908123	0.824	0.792	0.248	0.854	0.85	0.87	0.926	0.83	0.83	0.854	0.906	0.91	0.826	0.868	0.886	0.822	0.748	0.77	0.862	0.834	0.492	NO
hT30		0.712311	0.659002	0.596769	0.885002	0.908553	0.838	0.814	0.35	0.874	0.848	0.936	0.914	0.784	0.938	0.84	0.786	0.894	0.806	0.78	0.858	0.878	0.692	0.786	0.894	0.888	0.58	NO
hT58		0.790585	0.828978	0.81634	0.883745	0.85293	0.82	0.722	0.454	0.8	0.896	0.898	0.798	0.864	0.936	0.852	0.912	0.836	0.818	0.894	0.832	0.906	0.75	0.816	0.856	0.9	0.522	NO
hT81		0.76701	0.723152	0.636391	0.784308	0.928231	0.776	0.734	0.26	0.88	0.796	0.906	0.906	0.746	0.888	0.9	0.8	0.92	0.746	0.888	0.824	0.85	0.69	0.892	0.806	0.776	0.536	NO
hT83		0.691586	0.635907	0.636142	0.840244	0.895986	#N/A	#N/A	#N/A	#N/A	#N/A	#N/A	#N/A	#N/A	#N/A	#N/A	#N/A	#N/A	#N/A	#N/A	#N/A	#N/A	#N/A	#N/A	#N/A	#N/A	#N/A	NA
hT89		0.764546	0.731248	0.698375	0.926355	0.874661	0.796	0.846	0.352	0.848	0.718	0.91	0.926	0.738	0.914	0.83	0.914	0.914	0.832	0.79	0.758	0.776	0.768	0.824	0.86	0.792	0.524	YES
